# Supplementary material
Source: Copernicus journal article supplement (doi:10.5194/nhess-26-2653-2026)
Supplement: Supplementary file [file nhess-26-2653-2026-supplement-title-page.pdf › nhess-26-2653-2026-supplement-title-page.pdf]

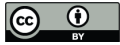

*Supplement of*

**Development of flood vulnerability functions for cultural heritage buildings and artworks for damage assessment in art cities**

**Claudia De Lucia and Chiara Arrighi**

*Correspondence to:* Chiara Arrighi ([chiara.arrighi@unifi.it](mailto:chiara.arrighi@unifi.it))

- [nhess-26-2653-2026-supplement-title-page.pdf](#)
- [SupplementS1\\_building.xls](#)
- [SupplementS2\\_artworks.xls](#)

The copyright of individual parts of the supplement might differ from the article licence.
